# Supplementary material
Source: PubMed Central journal article supplement (PMC5649762)
Supplement: supp_WNL.0000000000004419_e-tables.pdf [file supp_WNL.0000000000004419_e-tables.pdf]

**Table e-1:** Univariable and multivariable logistic regression for rupture status in current, former, and never smokers using complete cases only\* (N=4,596) and using prospective cases only\*\* (N=778).

| Characteristics           | Univariable*     |        | Multivariable*   |        | Univariable**    |        | Multivariable**  |        |
|---------------------------|------------------|--------|------------------|--------|------------------|--------|------------------|--------|
|                           | OR (95% CI)      | P-val. |
| Female                    | 0.64 (0.55-0.74) | <0.001 | 0.66 (0.57-0.77) | <0.001 | 0.83 (0.58-1.19) | 0.32   | -                | -      |
| Black (vs. white race)    | 1.93 (1.51-2.47) | <0.001 | 2.01 (1.55-2.61) | <0.001 | 1.97 (1.22-3.18) | 0.005  | 2.07 (1.27-3.36) | 0.003  |
| Hispanic (vs. white race) | 1.32 (1.01-1.72) | 0.04   | 1.44 (1.08-1.91) | 0.01   | 0.58 (0.30-1.12) | 0.11   | 0.61 (0.31-1.20) | 0.16   |
| Asian (vs. white race)    | 1.86 (1.25-2.76) | 0.002  | 2.06 (1.36-3.12) | 0.001  | 1.29 (0.49-3.37) | 0.61   | 1.51 (0.56-4.03) | 0.42   |
| Other (vs. white race)    | 1.32 (1.02-1.71) | 0.03   | 1.51 (1.15-1.98) | 0.003  | 1.88 (0.87-4.08) | 0.11   | 1.93 (0.88-4.23) | 0.10   |
| Age at diagnosis          | 0.98 (0.97-0.98) | <0.001 | 0.98 (0.98-0.99) | <0.001 | 1.00 (0.99-1.01) | 0.85   | -                | -      |
| Hypertension              | 1.11 (0.98-1.26) | 0.10   | -                | -      | 1.50 (1.11-2.02) | 0.008  | -                | -      |

|                                      |                  |        |                  |        |                  |       |                  |      |
|--------------------------------------|------------------|--------|------------------|--------|------------------|-------|------------------|------|
| Coronary artery disease              | 0.70 (0.51-0.95) | 0.02   | 0.74 (0.54-1.03) | 0.07   | 0.97 (0.54-1.75) | 0.92  | -                | -    |
| Myocardial infarction                | 0.86 (0.62-1.20) | 0.37   | -                | -      | 0.72 (0.45-1.14) | 0.16  | -                | -    |
| Atrial fibrillation                  | 1.02 (0.71-1.49) | 0.90   | -                | -      | 1.09 (0.53-2.24) | 0.83  | -                | -    |
| Diabetes                             | 0.74 (0.59-0.93) | 0.01   | 0.74 (0.58-0.94) | 0.02   | 0.81 (0.51-1.29) | 0.38  | -                | -    |
| Max. size largest aneurysm           | 1.01 (0.99-1.02) | 0.38   | -                | -      | 1.04 (1.00-1.08) | 0.05  | -                | -    |
| Mean number of aneurysms per patient | 1.02 (0.94-1.11) | 0.61   | -                | -      | 1.03 (0.89-1.20) | 0.66  | -                | -    |
| Family history aneurysms             | 0.60 (0.50-0.73) | <0.001 | 0.54 (0.44-0.65) | <0.001 | 0.67 (0.49-0.93) | 0.02  | 0.66 (0.47-0.93) | 0.02 |
| Family history SAH                   | 0.60 (0.47-0.76) | <0.001 | -                | -      | 0.66 (0.43-1.00) | 0.05  | -                | -    |
| Antihypertensive use                 | 0.89 (0.78-1.01) | 0.06   | -                | -      | 0.99 (0.74-1.33) | 0.96  | -                | -    |
| Former tobacco use (vs. never)       | 1.41 (1.19-1.67) | <0.001 | 1.65 (1.38-1.96) | <0.001 | 1.45 (1.01-2.08) | <0.05 | 1.48 (1.02-2.15) | 0.04 |

|                                 |                  |        |                  |        |                  |       |                  |       |
|---------------------------------|------------------|--------|------------------|--------|------------------|-------|------------------|-------|
| Current tobacco use (vs. never) | 2.30 (1.98-2.68) | <0.001 | 2.32 (1.98-2.71) | <0.001 | 1.79 (1.24-2.60) | 0.002 | 1.87 (1.28-2.73) | 0.001 |
|---------------------------------|------------------|--------|------------------|--------|------------------|-------|------------------|-------|

**Table e-2:** Univariable and multivariable logistic regression for rupture status in former and current smokers using complete cases

only\* (N=1,851) and using prospective cases only\*\* (N= 480).

| Characteristics           | Univariable*     |        | Multivariable*   |        | Univariable**     |        | Multivariable**  |        |
|---------------------------|------------------|--------|------------------|--------|-------------------|--------|------------------|--------|
|                           | OR (95% CI)      | P-val. | OR (95% CI)      | P-val. | OR (95% CI)       | P-val. | OR (95% CI)      | P-val. |
| Female                    | 0.64 (0.53-0.77) | <0.001 | 0.72 (0.57-0.91) | 0.006  | 0.71 (0.45-1.12)  | 0.14   | -                | -      |
| Black (vs. white race)    | 2.07 (1.49-2.88) | <0.001 | 1.90 (1.26-2.86) | 0.002  | 2.23 (1.24-4.02)  | 0.008  | 2.15 (1.02-4.54) | 0.04   |
| Hispanic (vs. white race) | 1.25 (0.83-1.88) | 0.28   | 1.12 (0.68-1.84) | 0.66   | 0.64 (0.26-1.55)  | 0.33   | 0.72 (0.24-2.14) | 0.56   |
| Asian (vs. white race)    | 2.40 (1.15-5.00) | 0.02   | 1.64 (0.64-4.17) | 0.30   | 5.50 (0.57-53.35) | 0.14   | 2.59 (0.14-46.5) | 0.52   |
| Other (vs. white race)    | 1.47 (1.02-2.13) | 0.04   | 1.54 (0.96-2.48) | 0.07   | 3.30 (1.08-10.0)  | 0.04   | 2.68 (0.77-9.30) | 0.12   |
| Age at diagnosis          | 0.98 (0.97-0.98) | <0.001 | 0.97 (0.96-0.98) | <0.001 | 0.99 (0.98-1.01)  | 0.44   | -                | -      |
| Hypertension              | 1.05 (0.89-1.24) | 0.55   | -                | -      | 1.31 (0.90-1.90)  | 0.16   | -                | -      |

|                                      |                  |        |                  |       |                  |       |                  |      |
|--------------------------------------|------------------|--------|------------------|-------|------------------|-------|------------------|------|
| Coronary artery disease              | 0.69 (0.48-0.97) | 0.04   | 0.70 (0.46-1.05) | 0.09  | 0.86 (0.45-1.62) | 0.64  | -                | -    |
| Myocardial infarction                | 0.69 (0.47-1.02) | 0.06   | -                | -     | 0.55 (0.32-0.94) | 0.03  | 0.53 (0.29-0.98) | 0.04 |
| Atrial fibrillation                  | 1.09 (0.68-1.73) | 0.73   | -                | -     | 1.14 (0.48-2.71) | 0.78  | -                | -    |
| Diabetes                             | 0.77 (0.57-1.03) | 0.08   | -                | -     | 0.82 (0.46-1.45) | 0.49  | -                | -    |
| Max. size largest aneurysm           | 1.02 (0.99-1.03) | 0.09   | 1.02 (1.00-1.04) | 0.07  | 1.04 (0.99-1.09) | 0.15  | -                | -    |
| Mean number of aneurysms per patient | 1.00 (0.91-1.10) | 0.99   | -                | -     | 1.02 (0.85-1.22) | 0.86  | -                | -    |
| Family history aneurysms             | 0.57 (0.45-0.71) | <0.001 | 0.63 (0.48-0.83) | 0.001 | 0.57 (0.38-0.85) | 0.006 | 0.60 (0.37-0.97) | 0.04 |
| Family history SAH                   | 0.66 (0.50-0.88) | 0.005  | -                | -     | 0.73 (0.44-1.22) | 0.23  | -                | -    |
| Antihypertensive use                 | 0.74 (0.63-0.88) | <0.001 | -                | -     | 0.87 (0.60-1.25) | 0.45  | -                | -    |
| Current tobacco (vs. former)         | 1.63 (1.38-1.93) | <0.001 | 1.19 (0.88-1.62) | 0.26  | 1.24 (0.86-1.79) | 0.25  | 1.05 (0.55-1.98) | 0.88 |

|                      |                  |        |                  |        |                  |       |                  |       |
|----------------------|------------------|--------|------------------|--------|------------------|-------|------------------|-------|
| Years smoked         | 1.01 (1.01-1.02) | <0.001 | 1.02 (1.01-1.03) | <0.001 | 1.02 (1.00-1.03) | 0.008 | 1.02 (1.00-1.04) | 0.04  |
| Packs per day        | 1.39 (1.20-1.60) | <0.001 | 1.39 (1.17-1.64) | <0.001 | 1.88 (1.28-2.77) | 0.001 | 2.07 (1.37-3.13) | 0.001 |
| Years since quit *** | 0.97 (0.96-0.98) | <0.001 | 1.00 (0.98-1.01) | 0.73   | 0.98 (0.96-0.99) | 0.002 | 0.99 (0.96-1.01) | 0.34  |

\*\*\*0 in current smokers
